# Supplementary material for: Structure, properties, and biological functions of nonribosomal lipopeptides from pseudomonads
Source: Royal Society of Chemistry journal article supplement (doi:10.1039/c9np00022d), 2019-08-22

## Gene clusters analysis

The BGC of the corresponding CLPs (Genbank Accesion Number: Thanamycin - KT362216.1; Putisolvin - DQ151887.2; Syringopeptin - AF286216.2) were analyzed using antiSMASH Version 4.2.0 in order to assign a C domain class. Snapshots of the BGC assignment are listed below. Abbreviations: C = Condensation domain; A = Adenylation domain; TE = Thioesterase domain; blue slim oval = T domain.

### *Thanamycin*

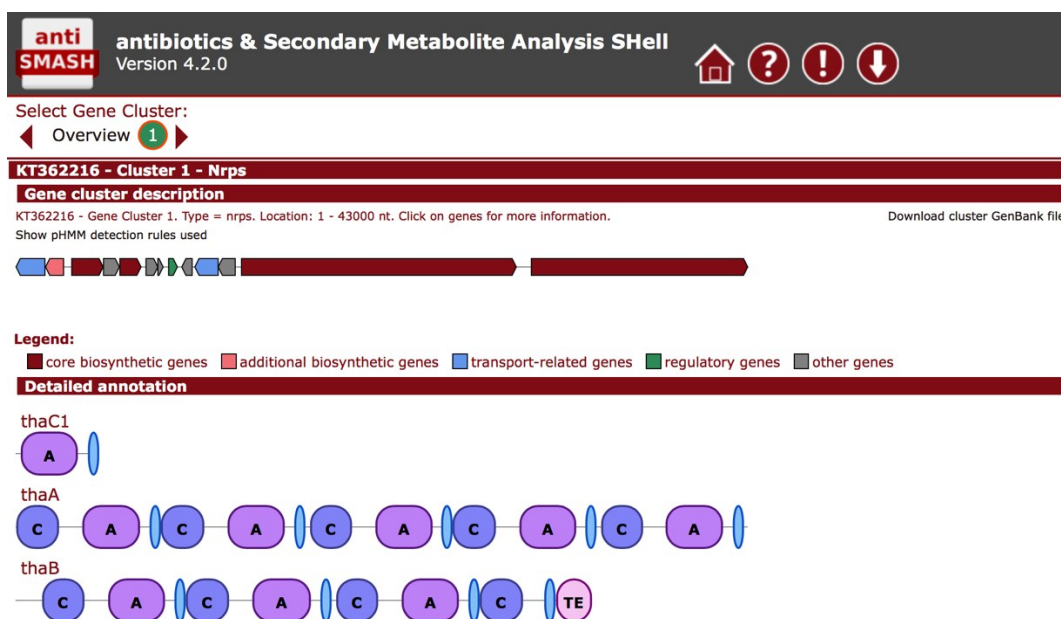

### *Putisolvin*

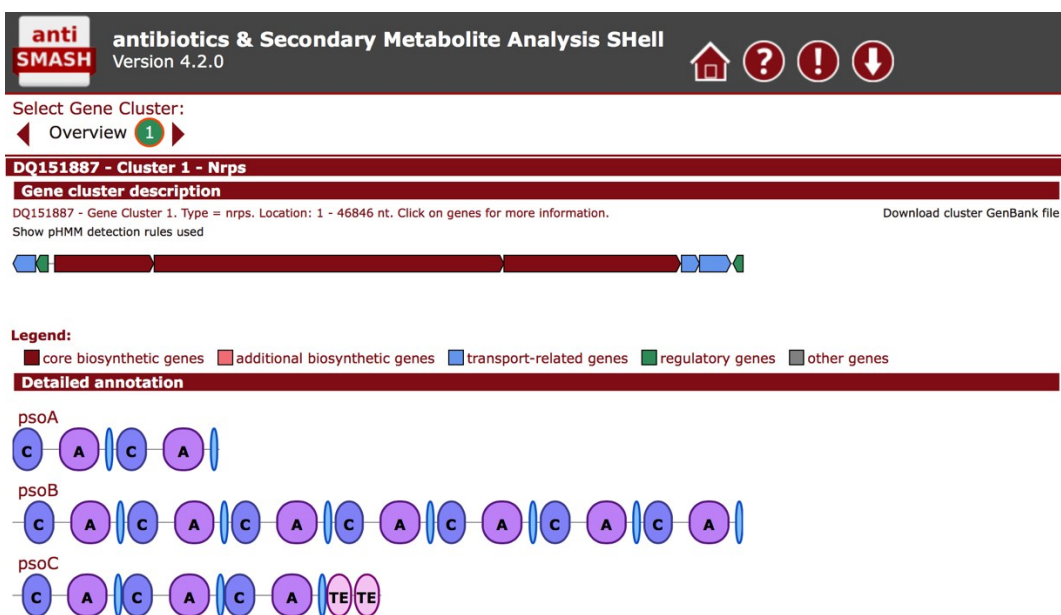

# Syringopeptin (SP-22)

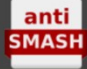

antibiotics & Secondary Metabolite Analysis SHell

Version 4.2.0

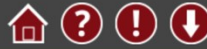

Select Gene Cluster:

◀ Overview 1 ▶

AF286216 - Cluster 1 - Nrps

Gene cluster description

AF286216 - Gene Cluster 1. Type = nrps. Location: 1 - 73800 nt. Click on genes for more information.

[Download cluster GenBank file](#)

Show pHMM detection rules used

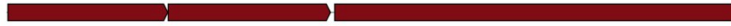

Legend:

■ core biosynthetic genes ■ additional biosynthetic genes ■ transport-related genes ■ regulatory genes ■ other genes

Detailed annotation

sypA

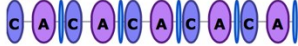

sypB

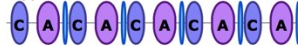

sypC

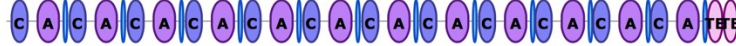

Supplement: c9np00022d1.pdf [file c9np00022d1.pdf]
