# Supplementary material for: Structure, properties, and biological functions of nonribosomal lipopeptides from pseudomonads
Source: Royal Society of Chemistry journal article supplement (doi:10.1039/c9np00022d), 2019-08-22
Supplement: c9np00022d2.xlsx [file c9np00022d2.xlsx]

## Sheet: Short CLPs
Reference (doi)	Method of Structure Elucidation	Pseudofactin Group
		Name	Fatty acid	AA 1	AA 2	AA 3	AA 4	AA 5	AA 6	AA 7	AA 8	Species
10.1016/j.biortech.2010.02.109	MS/MS	Pseudofactin I	Palmitic acid	Gly	Ser	Thr	Leu	Leu	Ser	Leu	Val	P. fluorescens BD5
10.1016/j.biortech.2010.02.109	MS/MS	Pseudofactin II	Palmitic acid	Gly	Ser	Thr	Leu	Leu	Ser	Leu	Leu	P. fluorescens BD5
10.1371/journal.pone.0125221	MS/MS; NMR; Marfey's Method	MDN-066	R1 (?)	Leu	D-Glu	D-alloThr	Leu	Leu	D-Ser	Leu	L-Ile	P. granadensis F-278,770T
10.1038/nmicrobiol.2016.197	MS/MS; NMR	Bananamide 1	R2 (?)	Leu	Asp	Thr	Leu	Leu	Gln	Leu	Ile	P. fluorescens BW11P2
10.1038/nmicrobiol.2016.197	MS/MS; NMR	Bananamide 2	R3 (?)	Leu	Asp	Thr	Leu	Leu	Gln	Leu	Ile	P. fluorescens BW11P2
10.1038/nmicrobiol.2016.197	MS/MS; NMR	Bananamide 3	R1 (?)	Leu	Asp	Thr	Leu	Leu	Gln	Leu	Ile	P. fluorescens BW11P2
		Viscosin Group
		Name	Fatty acid	AA 1	AA 2	AA 3	AA 4	AA 5	AA 6	AA 7	AA 8	AA 9	Species
10.1016/S0040-4039(00)95242-0	Total Synthesis	Viscosin	R1 (R)	L-Leu	D-Glu	D-alloThr	D-Val	L-Leu	D-Ser	L-Leu	D-Ser	L-Ile	P. viscosa
10.1046/j.1365-2672.1999.00798.x	NMR; degradation experiments	Viscosinamide A	R1 (?)	L-Leu	D-Gln	D-alloThr	D-Val	L-Leu	D-Ser	L-Leu	D-Ser	L-Ile	P. fluorescens DR54
10.1002/cbic.201402389	NMR	Viscosinamide B	R1 (?)	L-Leu	D-Gln	D-alloThr	D-Val	L-Leu	D-Ser	L-Leu	D-Ser	L-Val	P. fluorescens DR54
10.1002/cbic.201402389	NMR	Viscosinamide C	R1 (?)	L-Leu	D-Gln	D-alloThr	D-Val	L-Leu	D-Ser	L-Leu	D-Ser	L-Leu	P. fluorescens DR54
10.1002/cbic.201402389	NMR	Viscosinamide D	R2 (?)	L-Leu	D-Gln	D-alloThr	D-Val	L-Leu	D-Ser	L-Leu	D-Ser	L-Ile	P. fluorescens DR54
10.1107/S0108270192001690	X-ray	WLIP	R1 (R)	L-Leu	D-Glu	D-alloThr	D-Val	D-Leu	D-Ser	L-Leu	D-Ser	L-Ile	P. reactans
10.1107/S0108270102004432 and 10.1016/S0031-9422(02)00617-9	X-ray, GC-MS, NMR, chemical degradation	Pseudophomin A	R1 (R)	L-Leu	D-Glu	D-alloThr	D-Ile	D-Leu	D-Ser	L-Leu	D-Ser	L-Ile	P. fluorescens BRG100
10.1107/S0108270102004432 and 10.1016/S0031-9422(02)00617-9	X-ray, GC-MS, NMR, chemical degradation	Pseudophomin B	R2 (R)	L-Leu	D-Glu	D-alloThr	D-Ile	D-Leu	D-Ser	L-Leu	D-Ser	L-Ile	P. fluorescens BRG100
10.1016/j.tet.2009.03.045	X-ray, NMR	Pseudodesmin A	R1 (R)	L-Leu	D-Gln	D-alloThr	D-Val	D-Leu	D-Ser	L-Leu	D-Ser	L-Ile	P. tolaasii
10.1016/j.tet.2009.03.045	X-ray, NMR	Pseudodesmin B	R1 (R)	L-Leu	D-Gln	D-alloThr	D-Val	D-Leu	D-Ser	L-Leu	D-Ser	L-Val	P. tolaasii
10.1021/np9606456	MS/MS; NMR, degradation	Massetolide A	R1 (?)	L-Leu	D-Glu	D-alloThr	D-alloIle	L-Leu	D-Ser	L-Leu	D-Ser	L-Ile	P. sp. MK90e85
10.1021/np9606456	MS/MS; NMR, degradation	Massetolide B	R4 (?)	L-Leu	D-Glu	D-alloThr	D-alloIle	L-Leu	D-Ser	L-Leu	D-Ser	L-Ile	P. sp. MK90e85
10.1021/np9606456	MS/MS; NMR, degradation	Massetolide C	R2 (?)	L-Leu	D-Glu	D-alloThr	D-alloIle	L-Leu	D-Ser	L-Leu	D-Ser	L-Ile	P. sp. MK90e85
10.1021/np9606456	MS/MS; NMR, degradation	Massetolide D	R1 (?)	L-Leu	D-Glu	D-alloThr	D-alloIle	L-Leu	D-Ser	L-Leu	D-Ser	L-Leu	P. sp. MK90e85
10.1021/np9606456	MS/MS; NMR, degradation	Massetolide E	R1 (?)	L-Leu	D-Glu	D-alloThr	D-Val	L-Leu	D-Ser	L-Leu	D-Ser	L-Val	P. sp. MK90e85
10.1021/np9606456	MS/MS; NMR, degradation	Massetolide F	R1 (?)	L-Leu	D-Glu	D-alloThr	D-Val	L-Leu	D-Ser	L-Leu	D-Ser	L-Leu	P. sp. MK90e85
10.1021/np9606456	MS/MS; NMR, degradation	Massetolide G	R4 (?)	L-Leu	D-Glu	D-alloThr	D-Val	L-Leu	D-Ser	L-Leu	D-Ser	L-Ile	P. sp. MK90e85
10.1021/np9606456	MS/MS; NMR, degradation	Massetolide H	R2 (?)	L-Leu	D-Glu	D-alloThr	D-Val	L-Leu	D-Ser	L-Leu	D-Ser	L-Ile	P. sp. MK90e85
		Syringomycin Group
		Name	Fatty acid	AA 1	AA 2	AA 3	AA 4	AA 5	AA 6	AA 7	AA 8	AA 9	Species
10.1016/0014-5793(89)81054-3 and 10.1080/10575639408043899	MS/MS; NMR; degradation	Syringomycin 1 (SR-A1)	R1 (R)	L-Ser	D-Ser	D-Dab	L-Dab	L-Arg	L-Phe	Z-Dhb	L-Asp(3-(S)-OH)	L-Thr(4-Cl)	P. syringae pv. syringae
10.1016/0014-5793(89)81054-3 and 10.1080/10575639408043899	MS/MS; NMR; degradation	Syringomycin 2 (SR-E)	R2 (R)	L-Ser	D-Ser	D-Dab	L-Dab	L-Arg	L-Phe	Z-Dhb	L-Asp(3-(S)-OH)	L-Thr(4-Cl)	P. syringae pv. syringae
10.1016/0014-5793(89)81054-3 and 10.1080/10575639408043899	MS/MS; NMR; degradation	Syringomycin 3 (SR-G)	R5 (R)	L-Ser	D-Ser	D-Dab	L-Dab	L-Arg	L-Phe	Z-Dhb	L-Asp(3-(S)-OH)	L-Thr(4-Cl)	P. syringae pv. syringae
10.1039/p19920001149 and 10.1080/10575639408043899	MS/MS; NMR; Marfey's Method	Syringostatin A	R5 (?)	L-Ser	D-Dab	L-Dab	D-Hse	L-Orn	L-alloThr	Z-Dhb	L-Asp(3-(S)-OH)	L-Thr(4-Cl)	P. syringae pv. syringae
10.1039/p19920001149 and 10.1080/10575639408043899	MS/MS; NMR; Marfey's Method	Syringostatin B	R6 (?/?)	L-Ser	D-Dab	L-Dab	D-Hse	L-Orn	L-alloThr	Z-Dhb	L-Asp(3-(S)-OH)	L-Thr(4-Cl)	P. syringae pv. syringae
10.1016/0014-5793(90)81197-V and 10.1039/p19920001149	MS/MS; NMR	Syringotoxin (Syringotoxin B)	R5 (?)	L-Ser	D-Dab	Gly	D-Hse	L-Orn	L-alloThr	Z-Dhb	L-Asp(3-(S)-OH)	L-Thr(4-Cl)	P. syringae pv. syringae
10.1016/0014-5793(94)01179-6	MS/MS; NMR; Marfey's Method, Edman	Pseudomycin A	R6 (?/?)	L-Ser	D-Dab	L-Asp	L-Lys	L-Dab	L-alloThr	Z-Dhb	L-Asp(3-(S)-OH)	L-Thr(4-Cl)	P. syringae MSU 16H
10.1016/0014-5793(94)01179-6	MS/MS; NMR; Marfey's Method, Edman	Pseudomycin B	R5 (?)	L-Ser	D-Dab	L-Asp	L-Lys	L-Dab	L-alloThr	Z-Dhb	L-Asp(3-(S)-OH)	L-Thr(4-Cl)	P. syringae MSU 16H
10.1016/0014-5793(94)01179-6	MS/MS; NMR; Marfey's Method, Edman	Pseudomycin C	R7 (?/?)	L-Ser	D-Dab	L-Asp	L-Lys	L-Dab	L-alloThr	Z-Dhb	L-Asp(3-(S)-OH)	L-Thr(4-Cl)	P. syringae MSU 16H
10.1042/BJ20040422	MS/MS; NMR; Marfey's Method	Cormycin A	R7 (?/?)	L-Ser	D-Orn	L-Asn	D-Hse	L-His	L-alloThr	Z-Dhb	L-Asp(3-(S)-OH)	L-Thr(4-Cl)	P. corrugata IPVCT 10.3
10.1128/mBio.00079-15	MS/MS, NRPS prediction, NMR	Nunamycin	R5 (?)	Ser	Dab	Gly	Hse	Dab	Thr	Thr	Asp(3-(?)-OH)	Thr(Cl)	P. fluorescens In5
10.1038/ncomms9421 and 10.1126/science.1203980	MS/MS, NMR	Thanamycin	R7 (?/?)	Ser	Orn (a-OH)	Asn	Hse	His	Thr	Dhb (?)	Asp(3-(?)-OH)	Thr(Cl)	P. fluorescens DSM 11579
		Ferrocins
		Name	Fatty acid	AA 1	AA 2	AA 3	AA 4	AA 5	AA 6	AA 7	AA 8	AA 9	AA 10	Species
10.7164/antibiotics.46.287 and 10.7164/antibiotics.46.65	MS/MS; NMR; Marfey's Method	Ferrocin A	R8	L-Ser	N5-Ac-N5-OH-Orn	Gly	D-Val	L-Ser	N5-Ac-N5-OH-Orn	L-Ala	Gly	N5-Ac-N5-OH-Orn	Gly	P. fluorescens YK-310
10.7164/antibiotics.46.287 and 10.7164/antibiotics.46.66	MS/MS; NMR; Marfey's Method	Ferrocin B	R8	L-Ser	N5-Ac-N5-OH-Orn	Gly	D-Val	L-Ser	N5-Ac-N5-OH-Orn	L-Ser	Gly	N5-Ac-N5-OH-Orn	Gly	P. fluorescens YK-310
		Orfamide Group
		Name	Fatty acid	AA 1	AA 2	AA 3	AA 4	AA 5	AA 6	AA 7	AA 8	AA 9	AA 10	Species
10.1016/j.chembiol.2006.11.007	MS/MS, NMR, degradation, Marfey's M.	Orfamide A	R5 (?)	L-Leu	D-Glu	D-alloThr	D-allo Ile	L-Leu	D-Ser	L-Leu	L-Leu	D-Ser	L-Val	P. fluorescens Pf-5
10.1016/j.chembiol.2006.11.007	MS/MS, NMR, degradation, Marfey's M.	Orfamide B	R5 (?)	L-Leu	D-Glu	D-alloThr	D-Val	L-Leu	D-Ser	L-Leu	L-Leu	D-Ser	L-Val	P. fluorescens Pf-5
10.1016/j.chembiol.2006.11.007	MS/MS, NMR, degradation, Marfey's M.	Orfamide C	R2 (?)	L-Leu	D-Glu	D-alloThr	D-allo Ile	L-Leu	D-Ser	L-Leu	L-Leu	D-Ser	L-Val	P. fluorescens Pf-5
10.1111/1462-2920.12462	MS/MS	Orfamide D	R2 (?)	Leu	Glu	Thr	Val	Leu	Ser	Leu	Leu	Ser	Val	P. fluorescens CMR12a
10.3389/fmicb.2016.00382	MS/MS	Orfamide E	unknown	Leu	Glu	Thr	Val	Leu	Ser	Leu	Leu	Ser	Val	P. fluorescens CMR12a
10.3389/fmicb.2016.00382	MS/MS	Orfamide F	unknown	Leu	Glu	Thr	Val	Leu	Ser	Leu	Leu	Ser	Val	P. fluorescens CMR12a
10.3389/fmicb.2016.00382	MS/MS	Orfamide G	R9 (?)	Leu	Glu	Thr	Val	Leu	Ser	Leu	Leu	Ser	Val	P. fluorescens CMR12a
10.1094/MPMI-12-14-0406-R	MS/MS, NMR, degradation, Marfey's M.	Poaeamide A	R1 (R)	L-Leu	D-Glu	D-alloThr	D-Leu	L-Leu	D-Ser	L-Leu	L-Leu	D-Ser	L-Ile	P. poae RE*1-1-14
10.1038/nmicrobiol.2016.197	MS/MS, NMR	Poaeamide B	R1 (?)	Leu	Glu	Thr	Ile	Leu	Ser	Leu	Leu	Ser	Ile	P. synxantha CR32
PMID: 25230511 (no doi available)	MS/MS, NMR	PPZPM-1a	R1 (?)	Leu	D-Glu	D-alloThr	Ile	Leu	D-Ser	Leu	Leu	D-Ser	Ile	P. sp. Wu6
PMID: 25230511 (no doi available)	MS/MS, NMR	PPZPM-2a	R1 (?)	Leu	Glu	Thr	Val	Leu	Ser	Leu	Leu	Ser	Ile	P. sp. Wu6
		Amphisin Group
		Name	Fatty acid	AA 1	AA 2	AA 3	AA 4	AA 5	AA 6	AA 7	AA 8	AA 9	AA 10	AA 11	Species
10.1107/S0108270101010782	X-ray	Amphisin	R1 (R)	D-Leu	D-Asp	D-alloThr	D-Leu	D-Leu	D-Ser	L-Leu	D-Gln	L-Leu	L-Ile	L-Asp	P. sp. DSS73
10.1107/S0108270199013414	X-ray	Tensin	R1 (R)	D-Leu	D-Asp	D-alloThr	D-Leu	D-Leu	D-Ser	L-Leu	D-Gln	L-Leu	L-Ile	L-Glu	P. fluorescens 96.578
10.1021/acschembio.7b00589	X-ray, NMR, MS/MS, Marfey's Method	Anikasin	R1 (R)	D-Leu	D-Asp	D-alloThr	D-Leu	D-Leu	D-Ser	L-Leu	D-Ser	L-Leu	L-Ile	L-Asp	P. fluorescens HKI0770
10.1002/cbic.201200532	MS/MS, NMR	Arthrofactin A	R1 (?)	D-Leu	D-Asp	D-alloThr	D-Leu	D-Leu	D-Ser	L-Leu	D-Ser	L-Ile	L-Ile	L-Asp	P. fluorescens MIS38
10.1002/cbic.201200532	MS/MS, NMR	Arthrofactin B	R1 (?)	D-Leu	D-Asp	D-alloThr	D-Leu	D-Leu	D-Ser	L-Leu	D-Ser	L-Ile	L-Ile	L-Glu	P. fluorescens MIS38
10.1002/cbic.201200532	MS/MS, NMR	Arthrofactin C	unknown	D-Leu	D-Asp	D-alloThr	D-Leu	D-Leu	D-Ser	L-Leu	D-Ser	L-Ile	L-Ile	L-Asp	P. fluorescens MIS38
10.1002/cbic.201200532	MS/MS, NMR	Arthrofactin D	R2 (?)	D-Leu	D-Asp	D-alloThr	D-Leu	D-Leu	D-Ser	L-Leu	D-Ser	L-Ile	L-Ile	L-Asp	P. fluorescens MIS38
10.1021/jo9603993	MS/MS, NMR, degradation, Marfey's M.	Pholipeptin*	R1 (?)	D-Leu	L-Asp	L-Thr	D-Leu	D-Leu	D-Ser	D-Leu	D-Ser	D-Leu	L-Ile	D-Asp	P. fluorescens BMJ279-76F1
10.1016/S0040-4039(02)00856-0	MS/MS; NMR; Marfey's Method	Lokisin	R1 (?)	Leu	Asp	D-alloThr	Leu	Leu	D-Ser	Leu	D-Ser	Leu	L-Ile	Asp	P. sp. DSS41
10.3389/fmicb.2018.01030	MS/MS, NMR	Milkisin A	R10 (?)	Leu	Asp	Thr	Leu	Ile	Glu	Leu	Ser	Leu	Gln	Leu	P. sp. UCMA 17988
10.3389/fmicb.2018.01030	MS/MS, NMR	Milkisin B	R11 (?)	Leu	Asp	Thr	Leu	Ile	Glu	Leu	Ser	Leu	Gln	Leu	P. sp. UCMA 17988
10.3389/fmicb.2018.01030	MS/MS, NMR	Milkisin C	R1 (?)	Leu	Asp	Thr	Leu	Ile	Glu	Leu	Ser	Leu	Gln	Leu	P. sp. UCMA 17988
10.3389/fmicb.2018.01030	MS/MS, NMR	Milkisin D	R4 (?)	Leu	Asp	Thr	Leu	Ile	Glu	Leu	Ser	Leu	Gln	Leu	P. sp. UCMA 17988
		Cocoyamide A or Gacamide A	Fatty acid	AA 1	AA 2	AA 3	AA 4	AA 5	AA 6	AA 7	AA 8	AA 9	AA 10	AA 11	Species
10.1111/1462-2920.14520	NMR, MS	Cocoyamide A	R1 (R)	L-Leu	D-Asp	D-Gln	D-alloIle	D-Leu	D-Gln	D-Ser	L-Leu	L-Leu	D-Ser	L-Ile	P. koreensis or P. fluorescens Pf0-1
10.1021/acs.jnatprod.8b00747	NMR, MS, bioinformatics, chemical derivatization	Gacamide A
		Putisolvins
		Name	Fatty acid	AA 1	AA 2	AA 3	AA 4	AA 5	AA 6	AA 7	AA 8	AA 9	AA 10	AA 11	AA 12	Species
10.1046/j.1365-2958.2003.03751.x	MS/MS, NMR	Putisolvin I	Hexanoic acid	Leu	Glu	Leu	Ile	Gln	Ser	Val	Ile	Ser	Leu	Val	Ser	P. putida 267
10.1046/j.1365-2958.2003.03751.x	MS/MS, NMR	Putisolvin II	Hexanoic acid	Leu	Glu	Leu	Ile	Gln	Ser	Val	Ile	Ser	Leu	Leu or Ile	Ser	P. putida 267
		Xantholysin Group
		Name	Fatty acid	AA 1	AA 2	AA 3	AA 4	AA 5	AA 6	AA 7	AA 8	AA 9	AA 10	AA 11	AA 12	AA 13	AA 14	Species
10.1371/journal.pone.0062946	MS/MS, NMR	Xantholysin A	R1 (?)	Leu	Glu	Gln	Val	Leu	Gln	Ser	Val	Leu	Gln	Leu	Leu	Gln	Ile	P. putida BW11M1
10.1371/journal.pone.0062946	MS/MS, NMR	Xantholysin B	R1 (?)	Leu	Glu	Gln	Val	Leu	Gln	Ser	Val	Leu	Gln	Leu	Leu	Gln	Val	P. putida BW11M1
10.1371/journal.pone.0062946	MS/MS, NMR	Xantholysin C	R12 (?)	Leu	Glu	Gln	Val	Leu	Gln	Ser	Val	Leu	Gln	Leu	Leu	Gln	Ile	P. putida BW11M1
10.1021/ja410145x	Total Synthesis	Ma026	R1 (R)	L-Leu	D-Glu	D-Gln	D-Val	D-Leu	D-Gln	D-Ser	D-Val	D-Leu	L-Leu	D-Gln	L-Leu	D-Gln	L-Ile	P. sp. RtIB026
		Entolysin
		Name	Fatty acid	AA 1	AA 2	AA 3	AA 4	AA 5	AA 6	AA 7	AA 8	AA 9	AA 10	AA 11	AA 12	AA 13	AA 14	Species
10.1002/chem.201103479 and 10.1128/AEM.02112-09	MS/MS, NMR, labeling	Entolysin	R1 (?)	Leu	Glu	Gln	Val	Leu	Gln	Val	Leu	Gln	Ser	Val	Leu	Ser	Ile	P. entomophila

## Sheet: Long CLPs
Reference (doi)	Method of Structure Elucidation	Pseudofactin Group
		Tolaasin Group
		Name	Fatty acid	AA 1	AA 2	AA 3	AA 4	AA 5	AA 6	AA 7	AA 8	AA 9	AA 10	AA 11	AA 12	AA 13	AA 14	AA 15	AA 16	AA 17	AA 18	Species
10.1021/ja00007a040	MS/MS, NMR, degradation, Marfey's M.	Tolaasin I	R10 (?)	Z-Dhb	D-Pro	D-Ser	D-Leu	D-Val	D-Ser	D-Leu	D-Val	L-Val	D-Gln	L-Leu	D-Val	Z-Dhb	D-alloThr	L-Ile	L-Hse	D-Dab	L-Lys	P. tolaasii
10.1021/ja00007a040	MS/MS, NMR, degradation, Marfey's M.	Tolaasin II	R10 (?)	Z-Dhb	D-Pro	D-Ser	D-Leu	D-Val	D-Ser	D-Leu	D-Val	L-Val	D-Gln	L-Leu	D-Val	Z-Dhb	D-alloThr	L-Ile	Gly	D-Dab	L-Lys	P. tolaasii
10.1021/np0303557	MS/MS, NMR	Tolaasin A	R13	Z-Dhb	Pro	Ser	Leu	Val	Ser	Leu	Val	Val	Gln	Leu	Val	Z-Dhb	Thr	Ile	Hse	Dab	Lys	P. tolaasii
10.1021/np0303557	MS/MS, NMR	Tolaasin B	R10 (?)	Z-Dhb	Pro	Ser	Leu	Val	Ser	Leu	Val	Val	Gln	Leu	Val	Z-Dhb	Thr	Val	Hse	Dab	Lys	P. tolaasii
10.1021/np0303557	MS/MS, NMR	Tolaasin D	R10 (?)	Z-Dhb	Pro	Ser	Leu	Val	Ser	Leu	Val	Val	Gln	Leu	Val	Z-Dhb	Thr	Leu	Hse	Dab	Lys	P. tolaasii
10.1021/np0303557	MS/MS, NMR	Tolaasin E	R10 (?)	Z-Dhb	Pro	Ser	Leu	Val	Ser	Leu	Val	Val	Gln	Leu	Val	Z-Dhb	Thr	Gly	Hse	Dab	Lys	P. tolaasii
10.1002/cbic.201300553	MS/MS, labeling experiments	Tolaasin F	R10 (?)	Z-Dhb	D-Pro	D-Ser	D-Leu	D-Val	D-Ser	D-Leu	D-Val	D-Val	D-Gln	L-Leu	D-Val	Z-Dhb	D-alloThr	L-Leu	L-Hse	D-Dab	L-Lys	P. costantinii
10.1111/1462-2920.12462	MS/MS and NRPS prediction	Sesselin A	R10 (?)	Dhb (?)	Pro	Ser	Leu or Ile	Val	Gln	Leu or Ile	Val	Val	Gln	Leu or Ile	Val	Dhb (?)	Thr	Leu or Ile	Hse	Dab	Lys	P. fluorescens CMR12a
		Fuscopeptin Group
		Name	Fatty acid	AA 1	AA 2	AA 3	AA 4	AA 5	AA 6	AA 7	AA 8	AA 9	AA 10	AA 11	AA 12	AA 13	AA 14	AA 15	AA 16	AA 17	AA 18	AA 19	Species
10.1016/0014-5793(96)00043-9	MS/MS; NMR; Marfey's Method, Edman	Fuscopeptin A	R10 (?)	Z-Dhb	D-Pro	L-Leu	D-Ala	D-Ala	D-Ala	D-Ala	D-Val	Gly	D-Ala	D-Val	D-Ala	D-Val	Z-Dhb	D-alloThr	L-Ala	L-Dab	D-Dab	L-Phe	P. fuscovaginae
10.1016/0014-5793(96)00043-9	MS/MS; NMR; Marfey's Method, Edman	Fuscopeptin B	R1 (?)	Z-Dhb	D-Pro	L-Leu	D-Ala	D-Ala	D-Ala	D-Ala	D-Val	Gly	D-Ala	D-Val	D-Ala	D-Val	Z-Dhb	D-alloThr	L-Ala	L-Dab	D-Dab	L-Phe	P. fuscovaginae
10.1073/pnas.1721790115	MS/MS, NMR, degradation, Marfey's M.	Jessenipeptin	R1 (R)	Dhb (?)	D-Pro	D-Ile	D-Val	D-Ala	D-Ala	L-Ala	D-Val	D-Ser	D-Ala	D-Val	D-Ala	D-Leu	Dhb (?)	D-alloThr	L-Ala	L-Dab	D-Ser	L-Phe	P. sp. QS1027
		Corpeptin Group
		Name	Fatty acid	AA 1	AA 2	AA 3	AA 4	AA 5	AA 6	AA 7	AA 8	AA 9	AA 10	AA 11	AA 12	AA 13	AA 14	AA 15	AA 16	AA 17	AA 18	AA 19	AA 20	AA 21	AA 22	Species
10.1016/S0014-5793(98)00933-8	MS/MS, NMR, degradation, edman	Corpeptin A	R1 (?)	Dhb (?)	Pro	Ala	Ala	Ala	Val	Val	Dhb (?)	Hse	Val	alloIle	Dha	Ala	Ala	Ala	Val	Dhb (?)	alloThr	Ala	Dab	Ser	Ile	P. corrugata NCPPB 2445
10.1016/S0014-5793(98)00933-8	MS/MS, NMR, degradation, edman	Corpeptin B	R12 (?)	Dhb (?)	Pro	Ala	Ala	Ala	Val	Val	Dhb (?)	Hse	Val	alloIle	Dha	Ala	Ala	Ala	Val	Dhb (?)	alloThr	Ala	Dab	Ser	Ile	P. corrugata NCPPB 2445
10.1128/mBio.00079-15	MS/MS, NMR, NRPS prediction	Nunapeptin	R2 (?)	Dhb (?)	Pro	Ala	Ala	Ala	Val	Ala	Dhb (?)	Ser	Val	Ile	Dha	Ala	Val	Ala	Val	Dhb (?)	Thr	Ala	Dab	Ser	Ile	P. fluorescens In5
10.3389/fmicb.2015.00693	MS/MS, NRPS prediction	Thanapeptin	R1 (?)	Dhb (?)	Pro	Ala	Ala	Ala	Val	Val	Dhb (?)	Thr or Hse	Val	Ile or Leu	Dha	Ala	Ala	Ala	Val	Dhb (?)	Thr	Ala	Dab	Ser	Ile or Leu	P. sp. SH-C52
10.1094/MPMI-03-15-0061-R	MS/MS, NRPS prediction	Cichopeptin A	R12 (?)†	Dhb (?)	Pro	Ala	Ala	Ala	Ala	Val	Dhb (?)	Gly	Val	Ile or Leu	Gly	Ala	Val	Ala	Val	Dhb (?)	Thr	Ala	Dab	Ser	Ile or Leu	P. cichorii SF1-54
10.1094/MPMI-03-15-0061-R	MS/MS, NRPS prediction	Cichopeptin B	R12 (?)†	Dhb (?)	Pro	Ala	Ala	Ala	Ala	Val	Dhb (?)	Gly	Val	Ile or Leu	Gly	Ala	Val	Ala	Val	Dhb (?)	Thr	Ala	Dab	Ser	Val	P. cichorii SF1-54
		Syringopeptin (SP22) Group
		Name	Fatty acid	AA 1	AA 2	AA 3	AA 4	AA 5	AA 6	AA 7	AA 8	AA 9	AA 10	AA 11	AA 12	AA 13	AA 14	AA 15	AA 16	AA 17	AA 18	AA 19	AA 20	AA 21	AA 22	Species
10.1016/0014-5793(91)81115-O and 10.1111/j.1432-1033.1995.747_a.x	MS/MS, NMR, degradation, edman	SP22-A	R1 (?)	Z-Dhb	D-Pro	D-Val	L-Val	D-Ala	D-Ala	D-Val	D-Val	Z-Dhb	D-Ala	D-Val	L-Ala	D-Ala	Z-Dhb	D-alloThr	D-Ser	D-Ala	Z-Dhb	L-Ala	L-Dab	D-Dab	L-Tyr	P. syringae pv. Syringae B3A
10.1016/0014-5793(91)81115-O and 10.1111/j.1432-1033.1995.747_a.x	MS/MS, NMR, degradation, edman	SP22-B	R2 (?)	Z-Dhb	D-Pro	D-Val	L-Val	D-Ala	D-Ala	D-Val	D-Val	Z-Dhb	D-Ala	D-Val	L-Ala	D-Ala	Z-Dhb	D-alloThr	D-Ser	D-Ala	Z-Dhb	L-Ala	L-Dab	D-Dab	L-Tyr	P. syringae pv. Syringae B3A
10.1128/AAC.49.12.5037–5045.2005	MS/MS, NMR	SP508A	R2 (?)	Z-Dhb	Pro	Val	Leu	Ala	Ala	Leu	Val	Ala	Ala	Val	Ala	Ala	Z-Dhb	alloThr	Ser	Ala	Z-Dhb	Ala	Dab	Dab	Tyr	P. syringae pv. lachrymans 508
10.1128/AAC.49.12.5037–5045.2005	MS/MS, NMR	SP508B	R5 (?)	Z-Dhb	Pro	Val	Leu	Ala	Ala	Leu	Val	Ala	Ala	Val	Ala	Ala	Z-Dhb	alloThr	Ser	Ala	Z-Dhb	Ala	Dab	Dab	Tyr	P. syringae pv. lachrymans 508
10.1016/S0167-4838(02)00283-2	MS/MS, NMR	SP22PhvA	R1 (?)	Z-Dhb	Pro	Val	Leu	Ala	Ala	Ala	Val	Z-Dhb	Ala	Val	Ala	Ala	Z-Dhb	alloThr	Ser	Ala	Z-Dhb	Ala	Dab	Dab	Tyr	P. syringae pv. syringae Y37
10.1016/S0167-4838(02)00283-2	MS/MS, NMR	SP22PhvB	R2 (?)	Z-Dhb	Pro	Val	Leu	Ala	Ala	Ala	Val	Z-Dhb	Ala	Val	Ala	Ala	Z-Dhb	alloThr	Ser	Ala	Z-Dhb	Ala	Dab	Dab	Tyr	P. syringae pv. syringae Y37
10.1271/bbb.59.1374	MS/MS	SPC-1	R1 (?)	Dhb (?)	Pro	Val	Leu or Ile	Ala	Ala	Leu or Ile	Val	Dha	Ala	Val	Ala	Ala	Dhb (?)	Thr	Ser	Ala	Dhb (?)	Ala	Dab	Dab	Tyr	P. syringae pv. syringae SC1
10.1271/bbb.59.1374	MS/MS	SPC-2	R2 (?)	Dhb (?)	Pro	Val	Leu or Ile	Ala	Ala	Leu or Ile	Val	Dha	Ala	Val	Ala	Ala	Dhb (?)	Thr	Ser	Ala	Dhb (?)	Ala	Dab	Dab	Tyr	P. syringae pv. syringae SC1
		Syringopeptin (SP25) Group
		Name	Fatty acid	AA 1	AA 2	AA 3	AA 4	AA 5	AA 6	AA 7	AA 8	AA 9	AA 10	AA 11	AA 12	AA 13	AA 14	AA 15	AA 16	AA 17	AA 18	AA 19	AA 20	AA 21	AA 22	AA 23	AA 24	AA 25	Species
10.1016/0014-5793(91)81115-O and 10.1111/j.1432-1033.1995.747_a.x	MS/MS, NMR, degradation, edman	SP25-A	R1 (?)	Z-Dhb	D-Pro	D-Val	L-Ala	D-Ala	L-Val	D-Leu	D-Ala	D-Ala	Z-Dhb	D-Val	Z-Dhb	D-Ala	D-Val	D-Ala	D-Ala	Z-Dhb	D-alloThr	D-Ser	D-Ala	L-Val	L-Ala	L-Dab	D-Dab	L-Tyr	P. syringae pv. Syringae B359
10.1016/0014-5793(91)81115-O and 10.1111/j.1432-1033.1995.747_a.x	MS/MS, NMR, degradation, edman	SP25-B	R2 (?)	Z-Dhb	D-Pro	D-Val	L-Ala	D-Ala	L-Val	D-Leu	D-Ala	D-Ala	Z-Dhb	D-Val	Z-Dhb	D-Ala	D-Val	D-Ala	D-Ala	Z-Dhb	D-alloThr	D-Ser	D-Ala	L-Val	L-Ala	L-Dab	D-Dab	L-Tyr	P. syringae pv. Syringae B359
10.1006/pmpp.1997.0124	MS/MS, NMR, degradation, edman	Phe25-SP25A	R1 (?)	Dhb (?)	Pro	Val	Ala	Ala	Val	Leu	Ala	Ala	Dhb (?)	Val	Dhb (?)	Ala	Val	Ala	Ala	Dhb (?)	alloThr	Ser	Ala	Val	Ala	Dab	Dab	Phe	P. syringae pv. syringae NCPPB 3869

## Sheet: All LLPs including ref.
Reference (doi)	Method of Structure Elucidation	Syringafactin Group
		Name	Fatty acid	AA 1	AA 2	AA 3	AA 4	AA 5	AA 6	AA 7	AA 8	Species
10.1128/JB.00725-07	MS/MS; degradation; bioinformatics	Syringafactin A	R1 (R)	Leu	Leu	Gln	Leu	alloThr	Val	Leu	Leu	P. syringae pv. tomato DC3000
10.1128/JB.00725-07	MS/MS; degradation; bioinformatics	Syringafactin B	R1 (R)	Leu	Leu	Gln	Leu	alloThr	Leu	Leu	Leu	P. syringae pv. tomato DC3000
10.1128/JB.00725-07	MS/MS; degradation; bioinformatics	Syringafactin C	R1 (R)	Leu	Leu	Gln	Leu	alloThr	Ile	Leu	Leu	P. syringae pv. tomato DC3000
10.1128/JB.00725-07	MS/MS; degradation; bioinformatics	Syringafactin D	R2 (R)	Leu	Leu	Gln	Leu	alloThr	Val	Leu	Leu	P. syringae pv. tomato DC3000
10.1128/JB.00725-07	MS/MS; degradation; bioinformatics	Syringafactin E	R2 (R)	Leu	Leu	Gln	Leu	alloThr	Leu	Leu	Leu	P. syringae pv. tomato DC3000
10.1128/JB.00725-07	MS/MS; degradation; bioinformatics	Syringafactin F	R2 (R)	Leu	Leu	Gln	Leu	alloThr	Ile	Leu	Leu	P. syringae pv. tomato DC3000
10.1094/MPMI-11-12-0258-R	MS/MS; bioinformatics	Chicofactin A	R1 (R)	Leu	Leu	Gln	Leu	Gln	Val	Leu	Leu	P. cichorii SF1-54
10.1094/MPMI-11-12-0258-R	MS/MS; bioinformatics	Chicofactin B	R2 (R)	Leu	Leu	Gln	Leu	Gln	Val	Leu	Leu	P. cichorii SF1-54
		Corrugatin Group
		Name	Fatty acid	AA 1	AA 2	AA 3	AA 4	AA 5	AA 6	AA 7	AA 8	Species
10.1515/znc-1998-5-601	MS/MS, NMR, labeling, degradation	Corrugatin	Octanoic acid	L-OH-His	L-cDab	L-Dab	L-Ser	D-Ser	L-OH-Asp	L-cDab	L-OH-Asp	P. corrugata
10.1515/znc-2008-1-202	MS/MS, NMR, labeling, degradation	Ornicorrugatin	Octanoic acid	L-OH-His	L-cDab	D-Orn	Ser	Ser	L-OH-Asp	L-cDab	L-OH-Asp	P. fluorescens AF76
10.1007/s10534-016-9929-1	MS/MS, NRPS prediction	Histicorrugatin	Octanoic acid	OH-His	cDab or Dab	Orn	Ser	Ser	OH-Asp	cDab or Dab	OH-His	P. thivervalensis LMG 21626T
		Non-classifiable	Fatty acid	AA 1	AA 2	AA 3	AA 4	AA 5	AA 6	AA 7	AA 8	AA 9	AA 10	AA 11	AA 12	AA 13	AA 14	AA 15	AA 16	AA 17	AA 18	AA 19	AA 20	AA 21	AA 22	Species
10.1111/j.1574-6968.2008.01247.x	MS/MS, NMR	Peptin31	R2 (?)	Z-Dhb	Pro	Val	Leu	Ala	Ala	Z-Dhb	Ala	Dab	Dab	Tyr												P. syringae 31R1
10.1021/np0303557	MS/MS, NMR	Tolaasin C	R3 (?)	Z-Dhb	Pro	Ser	Leu	Val	Ser	Leu	Val	Val	Gln	Leu	Val	Z-Dhb	Thr	Ile	Hse	Dab	Lys					P. tolaasii
10.1139/w2012-079	MS/MS	Sclerosin	R1 (?)	Dhb (?)	Pro	Ala	Leu or Ile	Ala	Val	Val	Dhb (?)	Thr	Val	Leu or Ile	Dha	Ala	Ala	Ala	Val	Dhb (?)	Dhb (?)	Ala	Dab	Ser	Val	P. sp. DF41
